# Supplementary material for: Non-invasive biomarkers of disease activity and organ damage in ANCA-associated vasculitis: a systematic review
Source: PubMed Central journal article supplement — RMD Open. 2024 Feb 9;10(1):e003579. doi: 10.1136/rmdopen-2023-003579 (PMC10862256; doi:10.1136/rmdopen-2023-003579), 2024-02-09
Supplement: rmdopen-2023-003579supp001.pdf [file rmdopen-2023-003579supp001.pdf]

## SUPPLEMENTARY MATERIAL

### Search strategy

A search was conducted in OVID MEDLINE, OVID EMBASE, PubMed, Wiley Cochrane Database of Systematic Review, Wiley Cochrane Central Register of Controlled Trials, Web of Science, and ClinicalTrials.gov.

Search results were limited to English language and publication date from April 1, 2012 to April 1, 2022.

Number of results retrieved from each source:

- OVID MEDLINE: 3218
- OVID EMBASE: 778
- PubMed: 1670
- Cochrane Database of Systematic Reviews: 0
- Cochrane Central Register of Controlled Trials: 80
- Web of Science: 483
- ClinicalTrials.gov: 19

|                                                                                                         |   |
|---------------------------------------------------------------------------------------------------------|---|
| Ovid MEDLINE(R) .....                                                                                   | 1 |
| Embase .....                                                                                            | 2 |
| PubMed .....                                                                                            | 3 |
| Wiley Cochrane Library (Database of Systematic Reviews and Central Register of Controlled Trials) ..... | 3 |
| Web of Science .....                                                                                    | 4 |
| ClinicalTrials.gov .....                                                                                | 4 |
| Ovid MEDLINE(R) .....                                                                                   | 6 |
| Embase .....                                                                                            | 7 |
| PubMed .....                                                                                            | 7 |
| Wiley Cochrane Library (Database of Systematic Reviews and Central Register of Controlled Trials) ..... | 8 |
| Web of Science .....                                                                                    | 8 |
| ClinicalTrials.gov .....                                                                                | 9 |

### Ovid MEDLINE(R)

| # | Searches                                                        | Results |
|---|-----------------------------------------------------------------|---------|
| 1 | exp Anti-Neutrophil Cytoplasmic Antibody-Associated Vasculitis/ | 11634   |

|    |                                                                                                                                                                                                                                                                                                                                                                                                                                                                                                                   |         |
|----|-------------------------------------------------------------------------------------------------------------------------------------------------------------------------------------------------------------------------------------------------------------------------------------------------------------------------------------------------------------------------------------------------------------------------------------------------------------------------------------------------------------------|---------|
| 2  | (anti neutrophil cytoplasmic antibody associated vasculitis* or ANCA vasculitis* or ANCA associated vasculitis* or antineutrophil cytoplasmic antibody associated vasculitis* or neutrophil cytoplasmic antibody associated vasculitis* or pauci immune vasculitis* or churg strauss syndrome or allergic angiiti* or allergic granulomato* or churg-strauss vasculiti* or eosinophilic granulomatous vasculiti* or microscopic polyangiiti* or granulomatosis with polyangiiti* or wegener* granulomatos).kw,tw. | 8553    |
| 3  | 1 or 2                                                                                                                                                                                                                                                                                                                                                                                                                                                                                                            | 14911   |
| 4  | exp Biomarkers/                                                                                                                                                                                                                                                                                                                                                                                                                                                                                                   | 840541  |
| 5  | (biomarker* or biological marker* or biochemical marker* or biologic marker* or clinical marker* or immune marker* or immunologic marker* or laboratory marker* or serum marker* or surrogate end point* or surrogate endpoint* or viral marker*).kw,tw.                                                                                                                                                                                                                                                          | 388884  |
| 6  | 4 or 5                                                                                                                                                                                                                                                                                                                                                                                                                                                                                                            | 1058788 |
| 7  | 3 and 6                                                                                                                                                                                                                                                                                                                                                                                                                                                                                                           | 3844    |
| 8  | limit 7 to dt=20120401-20220401                                                                                                                                                                                                                                                                                                                                                                                                                                                                                   | 1785    |
| 9  | limit 7 to rd=20120401-20220401                                                                                                                                                                                                                                                                                                                                                                                                                                                                                   | 3666    |
| 10 | 8 or 9                                                                                                                                                                                                                                                                                                                                                                                                                                                                                                            | 3666    |
| 11 | limit 10 to english language                                                                                                                                                                                                                                                                                                                                                                                                                                                                                      | 3218    |

## Embase

| # | Searches                                                                                                                                                                                                                                                                                                                                                                                                                                                                                                          | Results |
|---|-------------------------------------------------------------------------------------------------------------------------------------------------------------------------------------------------------------------------------------------------------------------------------------------------------------------------------------------------------------------------------------------------------------------------------------------------------------------------------------------------------------------|---------|
| 1 | ANCA associated vasculitis/                                                                                                                                                                                                                                                                                                                                                                                                                                                                                       | 7854    |
| 2 | (anti neutrophil cytoplasmic antibody associated vasculitis* or ANCA vasculitis* or ANCA associated vasculitis* or antineutrophil cytoplasmic antibody associated vasculitis* or neutrophil cytoplasmic antibody associated vasculitis* or pauci immune vasculitis* or churg strauss syndrome or allergic angiiti* or allergic granulomato* or churg-strauss vasculiti* or eosinophilic granulomatous vasculiti* or microscopic polyangiiti* or granulomatosis with polyangiiti* or wegener* granulomatos).kw,tw. | 14572   |
| 3 | 1 or 2                                                                                                                                                                                                                                                                                                                                                                                                                                                                                                            | 16581   |
| 4 | biological marker/                                                                                                                                                                                                                                                                                                                                                                                                                                                                                                | 377388  |
| 5 | (biomarker* or biological marker* or biochemical marker* or biologic marker* or clinical marker* or immune marker* or immunologic marker* or laboratory marker* or serum marker* or surrogate end point* or surrogate endpoint* or viral marker*).kw,tw.                                                                                                                                                                                                                                                          | 588346  |
| 6 | 4 or 5                                                                                                                                                                                                                                                                                                                                                                                                                                                                                                            | 686215  |
| 7 | 3 and 6                                                                                                                                                                                                                                                                                                                                                                                                                                                                                                           | 830     |

|    |                                 |     |
|----|---------------------------------|-----|
| 8  | limit 7 to dd=20120401-20220401 | 417 |
| 9  | limit 7 to rd=20120401-20220401 | 390 |
| 10 | 8 or 9                          | 807 |
| 11 | limit 10 to english language    | 778 |

## PubMed

((("Anti-Neutrophil Cytoplasmic Antibody-Associated Vasculitis"[Mesh] ) OR (anti neutrophil cytoplasmic antibody associated vasculitis\*[Title/Abstract] OR ANCA vasculitis\*[Title/Abstract] OR ANCA associated vasculitis\*[Title/Abstract] OR antineutrophil cytoplasmic antibody associated vasculitis\*[Title/Abstract] OR neutrophil cytoplasmic antibody associated vasculitis\*[Title/Abstract] OR pauci immune vasculitis\*[Title/Abstract] OR churg strauss syndrome[Title/Abstract] OR allergic angiiti\*[Title/Abstract] OR allergic granulomato\*[Title/Abstract] OR churg-strauss vasculiti\*[Title/Abstract] OR eosinophilic granulomatous vasculiti\*[Title/Abstract] OR microscopic polyangiiti\*[Title/Abstract] OR granulomatosis with polyangiiti\*[Title/Abstract] OR wegener\* granulomatos[Title/Abstract])) AND (("Biomarkers"[Mesh]) OR (biomarker\*[Title/Abstract] OR biological marker\*[Title/Abstract] OR biochemical marker\*[Title/Abstract] OR biologic marker\*[Title/Abstract] OR clinical marker\*[Title/Abstract] OR immune marker\*[Title/Abstract] OR immunologic marker\*[Title/Abstract] OR laboratory marker\*[Title/Abstract] OR serum marker\*[Title/Abstract] OR surrogate end point\*[Title/Abstract] OR surrogate endpoint\*[Title/Abstract] OR viral marker\*[Title/Abstract]))) AND ("english"[Language])) Filters: from 2012/4/1 - 2022/4/1

## Wiley Cochrane Library (Database of Systematic Reviews and Central Register of Controlled Trials)

|    |                                                                                                                                                                                                                                                                                                                                                                                                                                                                                                                |     |
|----|----------------------------------------------------------------------------------------------------------------------------------------------------------------------------------------------------------------------------------------------------------------------------------------------------------------------------------------------------------------------------------------------------------------------------------------------------------------------------------------------------------------|-----|
| #1 | [mh "Anti-Neutrophil Cytoplasmic Antibody-Associated Vasculitis"]                                                                                                                                                                                                                                                                                                                                                                                                                                              | 176 |
| #2 | (anti neutrophil cytoplasmic antibody associated vasculitis* or ANCA vasculitis* or ANCA associated vasculitis* or antineutrophil cytoplasmic antibody associated vasculitis* or neutrophil cytoplasmic antibody associated vasculitis* or pauci immune vasculitis* or churg strauss syndrome or allergic angiiti* or allergic granulomato* or churg-strauss vasculiti* or eosinophilic granulomatous vasculiti* or microscopic polyangiiti* or granulomatosis with polyangiiti* or wegener* granulo):ti,ab,kw | 702 |

|    |                                                                                                                                                                                                                                                            |                                   |
|----|------------------------------------------------------------------------------------------------------------------------------------------------------------------------------------------------------------------------------------------------------------|-----------------------------------|
| #3 | #1 or #2                                                                                                                                                                                                                                                   | 702                               |
| #4 | [mh Biomarkers]                                                                                                                                                                                                                                            | 22422                             |
| #5 | (biomarker* or biological marker* or biochemical marker* or biologic marker* or clinical marker* or immune marker* or immunologic marker* or laboratory marker* or serum marker* or surrogate end point* or surrogate endpoint* or viral marker*):ti,ab,kw | 76161                             |
| #6 | #4 or #5                                                                                                                                                                                                                                                   | 80260                             |
| #7 | #3 and #6                                                                                                                                                                                                                                                  | 115                               |
| #8 | Limit #7 to 01/04/2012 to 01/04/2022                                                                                                                                                                                                                       | 80 trials<br>0 systematic reviews |

## Web of Science

anti neutrophil cytoplasmic antibody associated vasculitis\* or ANCA vasculitis\* or ANCA associated vasculitis\* or antineutrophil cytoplasmic antibody associated vasculitis\* or neutrophil cytoplasmic antibody associated vasculitis\* or pauci immune vasculitis\* or churg strauss syndrome or allergic angiiti\* or allergic granulomato\* or churg-strauss vasculiti\* or eosinophilic granulomatous vasculiti\* or microscopic polyangiiti\* or granulomatosis with polyangiiti\* or wegener\* granulo (Topic)

and

biomarker\* or biological marker\* or biochemical marker\* or biologic marker\* or clinical marker\* or immune marker\* or immunologic marker\* or laboratory marker\* or serum marker\* or surrogate end point\* or surrogate endpoint\* or viral marker\* (Topic)

and

2012-04-01/2022-04-01 (Publication Date)

and

English (Language)

## ClinicalTrials.gov

### Search 1:

Condition or disease: anti neutrophil cytoplasmic antibody associated vasculitis\*

Other terms: biomarkers

Study Start From 04/01/2012 To 04/01/2022

### Search 2:

Condition or disease: ANCA vasculitis\*

Other terms: biomarkers

Study Start From 04/01/2012 To 04/01/2022

**Search 3:**

Condition or disease: ANCA associated vasculitis\*

Other terms: biomarkers

Study Start From 04/01/2012 To 04/01/2022

**Search 4:**

Condition or disease: antineutrophil cytoplasmic antibody associated vasculitis\*

Other terms: biomarkers

Study Start From 04/01/2012 To 04/01/2022

**Search 5:**

Condition or disease: neutrophil cytoplasmic antibody associated vasculitis\*

Other terms: biomarkers

Study Start From 04/01/2012 To 04/01/2022

**Updated search (extension of time frame):**

A search was conducted in OVID MEDLINE, OVID EMBASE, PubMed, Wiley Cochrane Database of Systematic Review, Wiley Cochrane Central Register of Controlled Trials, Web of Science, and ClinicalTrials.gov.

The updated search was conducted on October 17, 2023. The results were limited to English language and publication date from April 2, 2022, to April 1, 2023.

Number of results retrieved from each source:

- OVID MEDLINE: 354
- OVID EMBASE: 110
- PubMed: 389
- Cochrane Database of Systematic Reviews: 0
- Cochrane Central Register of Controlled Trials: 9
- Web of Science: 149
- ClinicalTrials.gov: 0

|                                                                                                         |   |
|---------------------------------------------------------------------------------------------------------|---|
| Ovid MEDLINE(R) ALL 1946 to October 16, 2023.....                                                       | 6 |
| Embase 1974 to 2023 October 16.....                                                                     | 7 |
| PubMed.....                                                                                             | 7 |
| Wiley Cochrane Library (Database of Systematic Reviews and Central Register of Controlled Trials) ..... | 8 |
| Web of Science .....                                                                                    | 8 |
| ClinicalTrials.gov.....                                                                                 | 9 |

**Ovid MEDLINE(R)**

| # | Searches                                                                                                                                                                                                                                                                                                                                                                                                                                                                                                          | Results |
|---|-------------------------------------------------------------------------------------------------------------------------------------------------------------------------------------------------------------------------------------------------------------------------------------------------------------------------------------------------------------------------------------------------------------------------------------------------------------------------------------------------------------------|---------|
| 1 | exp Anti-Neutrophil Cytoplasmic Antibody-Associated Vasculitis/                                                                                                                                                                                                                                                                                                                                                                                                                                                   | 12451   |
| 2 | (anti neutrophil cytoplasmic antibody associated vasculitis* or ANCA vasculitis* or ANCA associated vasculitis* or antineutrophil cytoplasmic antibody associated vasculitis* or neutrophil cytoplasmic antibody associated vasculitis* or pauci immune vasculitis* or churg strauss syndrome or allergic angiiti* or allergic granulomato* or churg-strauss vasculiti* or eosinophilic granulomatous vasculiti* or microscopic polyangiiti* or granulomatosis with polyangiiti* or wegener* granulomatos).kw,tw. | 9858    |
| 3 | 1 or 2                                                                                                                                                                                                                                                                                                                                                                                                                                                                                                            | 16261   |
| 4 | exp Biomarkers/                                                                                                                                                                                                                                                                                                                                                                                                                                                                                                   | 886771  |

|   |                                                                                                                                                                                                                                                          |         |
|---|----------------------------------------------------------------------------------------------------------------------------------------------------------------------------------------------------------------------------------------------------------|---------|
| 5 | (biomarker* or biological marker* or biochemical marker* or biologic marker* or clinical marker* or immune marker* or immunologic marker* or laboratory marker* or serum marker* or surrogate end point* or surrogate endpoint* or viral marker*).kw,tw. | 468102  |
| 6 | 4 or 5                                                                                                                                                                                                                                                   | 1158120 |
| 7 | 3 and 6                                                                                                                                                                                                                                                  | 4392    |
| 8 | limit 7 to dt=20220402-20230401                                                                                                                                                                                                                          | 354     |

## Embase

| #  | Searches                                                                                                                                                                                                                                                                                                                                                                                                                                                                                                          | Results |
|----|-------------------------------------------------------------------------------------------------------------------------------------------------------------------------------------------------------------------------------------------------------------------------------------------------------------------------------------------------------------------------------------------------------------------------------------------------------------------------------------------------------------------|---------|
| 1  | ANCA associated vasculitis/                                                                                                                                                                                                                                                                                                                                                                                                                                                                                       | 9403    |
| 2  | (anti neutrophil cytoplasmic antibody associated vasculitis* or ANCA vasculitis* or ANCA associated vasculitis* or antineutrophil cytoplasmic antibody associated vasculitis* or neutrophil cytoplasmic antibody associated vasculitis* or pauci immune vasculitis* or churg strauss syndrome or allergic angiiti* or allergic granulomato* or churg-strauss vasculiti* or eosinophilic granulomatous vasculiti* or microscopic polyangiiti* or granulomatosis with polyangiiti* or wegener* granulomatos).kw,tw. | 16888   |
| 3  | 1 or 2                                                                                                                                                                                                                                                                                                                                                                                                                                                                                                            | 19341   |
| 4  | biological marker/                                                                                                                                                                                                                                                                                                                                                                                                                                                                                                | 438083  |
| 5  | (biomarker* or biological marker* or biochemical marker* or biologic marker* or clinical marker* or immune marker* or immunologic marker* or laboratory marker* or serum marker* or surrogate end point* or surrogate endpoint* or viral marker*).kw,tw.                                                                                                                                                                                                                                                          | 696019  |
| 6  | 4 or 5                                                                                                                                                                                                                                                                                                                                                                                                                                                                                                            | 804881  |
| 7  | 3 and 6                                                                                                                                                                                                                                                                                                                                                                                                                                                                                                           | 1006    |
| 8  | limit 7 to dd=20220402-20230401                                                                                                                                                                                                                                                                                                                                                                                                                                                                                   | 26      |
| 9  | limit 7 to rd=20220402-20230401                                                                                                                                                                                                                                                                                                                                                                                                                                                                                   | 84      |
| 10 | 8 or 9                                                                                                                                                                                                                                                                                                                                                                                                                                                                                                            | 110     |

## PubMed

((("Anti-Neutrophil Cytoplasmic Antibody-Associated Vasculitis"[Mesh] ) OR (anti neutrophil cytoplasmic antibody associated vasculitis\*[Title/Abstract] OR ANCA vasculitis\*[Title/Abstract] OR ANCA associated vasculitis\*[Title/Abstract] OR antineutrophil cytoplasmic antibody associated vasculitis\*[Title/Abstract] OR neutrophil cytoplasmic antibody associated vasculitis\*[Title/Abstract] OR pauci immune vasculitis\*[Title/Abstract] OR churg strauss syndrome[Title/Abstract] OR allergic angiiti\*[Title/Abstract] OR allergic granulomato\*[Title/Abstract] OR churg-strauss vasculiti\*[Title/Abstract] OR eosinophilic granulomatous vasculiti\*[Title/Abstract] OR microscopic

polyangiiti\*[Title/Abstract] OR granulomatosis with polyangiiti\*[Title/Abstract] OR wegener\* granulomatos[Title/Abstract])) AND (("Biomarkers"[Mesh]) OR (biomarker\*[Title/Abstract] OR biological marker\*[Title/Abstract] OR biochemical marker\*[Title/Abstract] OR biologic marker\*[Title/Abstract] OR clinical marker\*[Title/Abstract] OR immune marker\*[Title/Abstract] OR immunologic marker\*[Title/Abstract] OR laboratory marker\*[Title/Abstract] OR serum marker\*[Title/Abstract] OR surrogate end point\*[Title/Abstract] OR surrogate endpoint\*[Title/Abstract] OR viral marker\*[Title/Abstract]))) AND ("english"[Language]) Filters: From 2022/4/2 to 2023/4/1

## Wiley Cochrane Library (Database of Systematic Reviews and Central Register of Controlled Trials)

| ID | Search                                                                                                                                                                                                                                                                                                                                                                                                                                                                                                         | Hits                             |
|----|----------------------------------------------------------------------------------------------------------------------------------------------------------------------------------------------------------------------------------------------------------------------------------------------------------------------------------------------------------------------------------------------------------------------------------------------------------------------------------------------------------------|----------------------------------|
| #1 | [mh "Anti-Neutrophil Cytoplasmic Antibody-Associated Vasculitis"]                                                                                                                                                                                                                                                                                                                                                                                                                                              | 240                              |
| #2 | (anti neutrophil cytoplasmic antibody associated vasculitis* or ANCA vasculitis* or ANCA associated vasculitis* or antineutrophil cytoplasmic antibody associated vasculitis* or neutrophil cytoplasmic antibody associated vasculitis* or pauci immune vasculitis* or churg strauss syndrome or allergic angiiti* or allergic granulomato* or churg-strauss vasculiti* or eosinophilic granulomatous vasculiti* or microscopic polyangiiti* or granulomatosis with polyangiiti* or wegener* granulo):ti,ab,kw | 784                              |
| #3 | #1 or #2                                                                                                                                                                                                                                                                                                                                                                                                                                                                                                       | 784                              |
| #4 | [mh Biomarkers]                                                                                                                                                                                                                                                                                                                                                                                                                                                                                                | 26952                            |
| #5 | (biomarker* or biological marker* or biochemical marker* or biologic marker* or clinical marker* or immune marker* or immunologic marker* or laboratory marker* or serum marker* or surrogate end point* or surrogate endpoint* or viral marker*):ti,ab,kw                                                                                                                                                                                                                                                     | 87499                            |
| #6 | #4 or #5                                                                                                                                                                                                                                                                                                                                                                                                                                                                                                       | 92605                            |
| #7 | #3 and #6                                                                                                                                                                                                                                                                                                                                                                                                                                                                                                      | 143                              |
| #8 | Limit #7 to 02/04/2022 to 01/04/2023                                                                                                                                                                                                                                                                                                                                                                                                                                                                           | 9 trials<br>0 systematic reviews |

## Web of Science

anti neutrophil cytoplasmic antibody associated vasculitis\* or ANCA vasculitis\* or ANCA associated vasculitis\* or antineutrophil cytoplasmic antibody associated vasculitis\* or neutrophil cytoplasmic antibody associated vasculitis\* or pauci immune vasculitis\* or churg strauss syndrome or allergic angiiti\* or allergic granulomato\* or churg-strauss vasculiti\* or eosinophilic granulomatous vasculiti\* or microscopic polyangiiti\* or granulomatosis with polyangiiti\* or wegener\* granulo (Topic)

and



biomarker\* or biological marker\* or biochemical marker\* or biologic marker\* or clinical marker\* or immune marker\* or immunologic marker\* or laboratory marker\* or serum marker\* or surrogate endpoint\* or surrogate endpoint\* or viral marker\* (Topic)

and

2022-04-02/2023-04-01 (Publication Date)

and

English (Language)

## ClinicalTrials.gov

### Search 1:

Condition or disease: anti neutrophil cytoplasmic antibody associated vasculitis\*

Other terms: biomarkers

Study Start From 04/02/2022 To 04/01/2023

### Search 2:

Condition or disease: ANCA vasculitis\*

Other terms: biomarkers

Study Start From 04/02/2022 To 04/01/2023

### Search 3:

Condition or disease: ANCA associated vasculitis\*

Other terms: biomarkers

Study Start From 04/02/2022 To 04/01/2023

### Search 4:

Condition or disease: antineutrophil cytoplasmic antibody associated vasculitis\*

Other terms: biomarkers

Study Start From 04/02/2022 To 04/01/2023

### Search 5:

Condition or disease: neutrophil cytoplasmic antibody associated vasculitis\*

Other terms: biomarkers

Study Start From 04/02/2022 To 04/01/2023
